# Supplementary material for: RANTES/CCL5 and Risk for Coronary Events: Results from the MONICA/KORA Augsburg Case-Cohort, Athero-Express and CARDIoGRAM Studies
Source: PLoS One. 2011 Dec 6;6(12):e25734. doi: 10.1371/journal.pone.0025734 (PMC3232218; doi:10.1371/journal.pone.0025734)
Supplement: Text S1 — Members and affiliations of the CARDIoGRAM Consortium are listed in the Supplementary Information. (DOC) [file pone.0025734.s001.doc]

Online Text S1. Members and affiliations of the CARDIoGRAM Consortium.

**Executive Committee**: Sekar Kathiresan1,2,3, Muredach P. Reilly4, Nilesh J. Samani5,6, Heribert Schunkert7

**Executive Secretary:** Jeanette Erdmann7

**Steering Committee:** Themistocles L. Assimes8, Eric Boerwinkle9, Jeanette Erdmann7, Alistair Hall10, Christian Hengstenberg11, Sekar Kathiresan1,2,3, Inke R. König12, Reijo Laaksonen13, Ruth McPherson14, Muredach P. Reilly4, Nilesh J. Samani5,6, Heribert Schunkert7, John R. Thompson15, Unnur Thorsteinsdottir16,17, Andreas Ziegler12

**Statisticians**: Inke R. König12 (chair), John R. Thompson15 (chair), Devin Absher18, Li Chen19, L. Adrienne Cupples20,21, Eran Halperin22, Mingyao Li23, Kiran Musunuru1,2,3, Michael Preuss12,7, Arne Schillert12, Gudmar Thorleifsson16, Benjamin F. Voight2,3,24, George A. Wells25

**Writing group**: Themistocles L. Assimes8, Panos Deloukas26, Jeanette Erdmann7, Hilma Holm16, Sekar Kathiresan1,2,3, Inke R. König12, Ruth McPherson14, Muredach P. Reilly4, Robert Roberts14, Nilesh J. Samani5,6, Heribert Schunkert7, Alexandre F. R. Stewart14

**ADVANCE:** Devin Absher18, Themistocles L. Assimes8, Stephen Fortmann8, Alan Go27, Mark Hlatky8, Carlos Iribarren27, Joshua Knowles8, Richard Myers18, Thomas Quertermous8, Steven Sidney27, Neil Risch28, Hua Tang29

**CADomics**: Stefan Blankenberg30, Tanja Zeller30, Arne Schillert12, Philipp Wild30, Andreas Ziegler12, Renate Schnabel30, Christoph Sinning30, Karl Lackner31, Laurence Tiret32, Viviane Nicaud32, Francois Cambien32, Christoph Bickel30, Hans J. Rupprecht30, Claire Perret32, Carole Proust32, Thomas Münzel30

**CHARGE**: Maja Barbalic33, Joshua Bis34, Eric Boerwinkle9, Ida Yii-Der Chen35, L. Adrienne Cupples20,21, Abbas Dehghan36, Serkalem Demissie-Banjaw37,21, Aaron Folsom38, Nicole Glazer39, Vilmundur Gudnason40,41, Tamara Harris42, Susan Heckbert43, Daniel Levy21, Thomas Lumley44, Kristin Marciante45, Alanna Morrison46, Christopher J. O´Donnell47, Bruce M. Psaty48, Kenneth Rice49, Jerome I. Rotter35, David S. Siscovick50, Nicholas Smith43, Albert Smith40,41, Kent D. Taylor35, Cornelia van Duijn36, Kelly Volcik46, Jaqueline Whitteman36, Vasan Ramachandran51, Albert Hofman36, Andre Uitterlinden52,36

**deCODE**: Solveig Gretarsdottir16, Jeffrey R. Gulcher16, Hilma Holm16, Augustine Kong16, Kari Stefansson16,17, Gudmundur Thorgeirsson53,17, Karl Andersen53,17, Gudmar Thorleifsson16, Unnur Thorsteinsdottir16,17

**GERMIFS I and II:** Jeanette Erdmann7, Marcus Fischer11, Anika Grosshennig12,7, Christian Hengstenberg11, Inke R. König12, Wolfgang Lieb54, Patrick Linsel-Nitschke7, Michael Preuss12,7, Klaus Stark11, Stefan Schreiber55, H.-Erich Wichmann56,58,59, Andreas Ziegler12, Heribert Schunkert7

**GERMIFS III (KORA)**: Zouhair Aherrahrou7, Petra Bruse7, Angela Doering56, Jeanette Erdmann7, Christian Hengstenberg11, Thomas Illig56, Norman Klopp56, Inke R. König12, Patrick Linsel-Nitschke7, Christina Loley12,7, Anja Medack7, Christina Meisinger56, Thomas Meitinger57,60, Janja Nahrstedt12,7, Annette Peters56, Michael Preuss12,7, Klaus Stark11, Arnika K. Wagner7, H.-Erich Wichmann56,58,59, Christina Willenborg12,7, Andreas Ziegler12, Heribert Schunkert7

**LURIC/AtheroRemo**: Bernhard O. Böhm61, Harald Dobnig62, Tanja B. Grammer63, Eran Halperin22, Michael M. Hoffmann64, Marcus Kleber65, Reijo Laaksonen13, Winfried März63,66,67, Andreas Meinitzer66, Bernhard R. Winkelmann68, Stefan Pilz62, Wilfried Renner66, Hubert Scharnagl66, Tatjana Stojakovic66, Andreas Tomaschitz62, Karl Winkler64

**MIGen**: Benjamin F. Voight2,3,24, Kiran Musunuru1,2,3, Candace Guiducci3, Noel Burtt3, Stacey B. Gabriel3, David S. Siscovick50, Christopher J. O’Donnell47, Roberto Elosua69, Leena Peltonen49, Veikko Salomaa70, Stephen M. Schwartz50, Olle Melander26, David Altshuler71,3, Sekar Kathiresan1,2,3

**OHGS**: Alexandre F. R. Stewart14, Li Chen19, Sonny Dandona14, George A. Wells25, Olga Jarinova14, Ruth McPherson14, Robert Roberts14

**PennCATH/MedStar**: Muredach P. Reilly4, Mingyao Li23, Liming Qu23, Robert Wilensky4, William Matthai4, Hakon H. Hakonarson72, Joe Devaney73, Mary Susan Burnett73, Augusto D. Pichard73, Kenneth M. Kent73, Lowell Satler73, Joseph M. Lindsay73, Ron Waksman73, Christopher W. Knouff74, Dawn M. Waterworth74, Max C. Walker74, Vincent Mooser74, Stephen E. Epstein73, Daniel J. Rader75,4

**WTCCC**: Nilesh J. Samani5,6, John R. Thompson15, Peter S. Braund5, Christopher P. Nelson5, Benjamin J. Wright76, Anthony J. Balmforth77, Stephen G. Ball78, Alistair S. Hall10, Wellcome Trust Case Control Consortium

**Affiliations**

1 Cardiovascular Research Center and Cardiology Division, Massachusetts General Hospital, Boston, MA, USA; 2 Center for Human Genetic Research, Massachusetts General Hospital, Boston, MA, USA; 3 Program in Medical and Population Genetics, Broad Institute of Harvard and Massachusetts Institute of Technology (MIT), Cambridge, MA, USA; 4 The Cardiovascular Institute, University of Pennsylvania, Philadelphia, PA, USA; 5 Department of Cardiovascular Sciences, University of Leicester, Glenfield Hospital, Leicester, UK; 6 Leicester National Institute for Health Research Biomedical Research Unit in Cardiovascular Disease, Glenfield Hospital, Leicester, LE3 9QP, UK; 7 Medizinische Klinik II, Universität zu Lübeck, Lübeck, Germany; 8 Department of Medicine, Stanford University School of Medicine, Stanford, CA, USA; 9 University of Texas Health Science Center, Human Genetics Center and Institute of Molecular Medicine, Houston, TX, USA; 10 Division of Cardiovascular and Neuronal Remodelling, Multidisciplinary Cardiovascular Research Centre, Leeds Institute of Genetics, Health and Therapeutics, University of Leeds, UK; 11 Klinik und Poliklinik für Innere Medizin II, Universität Regensburg, Regensburg, Germany; 12 Institut für Medizinische Biometrie und Statistik, Universität zu Lübeck, Lübeck, Germany; 13 Science Center, Tampere University Hospital, Tampere, Finland; 14 The John & Jennifer Ruddy Canadian Cardiovascular Genetics Centre, University of Ottawa Heart Institute, Ottawa, Canada; 15 Department of Health Sciences, University of Leicester, Leicester, UK; 16 deCODE Genetics, 101 Reykjavik, Iceland; 17 University of Iceland, Faculty of Medicine, 101 Reykjavik, Iceland; 18 Hudson Alpha Institute, Huntsville, Alabama, USA; 19 Cardiovascular Research Methods Centre, University of Ottawa Heart Institute, 40 Ruskin Street, Ottawa, Ontario, Canada, K1Y 4W7; 20 Department of Biostatistics, Boston University School of Public Health, Boston, MA USA; 21 National Heart, Lung and Blood Institute's Framingham Heart Study, Framingham, MA, USA; 22 The Blavatnik School of Computer Science and the Department of Molecular Microbiology and Biotechnology, Tel-Aviv University, Tel-Aviv, Israel, and the International Computer Science Institute, Berkeley, CA, USA; 23 Biostatistics and Epidemiology, University of Pennsylvania, Philadelphia, PA, USA; 24 Department of Medicine, Harvard Medical School, Boston, MA, USA; 25 Research Methods, Univ Ottawa Heart Inst; 26 Department of Clinical Sciences, Hypertension and Cardiovascular Diseases, Scania University Hospital, Lund University, Malmö, Sweden; 27 Division of Research, Kaiser Permanente, Oakland, CA, USA; 28 Institute for Human Genetics, University of California, San Francisco, San Francisco, CA, USA; 29 Dept Cardiovascular Medicine, Cleveland Clinic; 30 Medizinische Klinik und Poliklinik, Johannes-Gutenberg Universität Mainz, Universitätsmedizin, Mainz, Germany; 31 Institut für Klinische Chemie und Laboratoriumsmediizin, Johannes-Gutenberg Universität Mainz, Universitätsmedizin, Mainz, Germany; 32 INSERM UMRS 937, Pierre and Marie Curie University (UPMC, Paris 6) and Medical School, Paris, France; 33 University of Texas Health Science Center, Human Genetics Center, Houston, TX, USA; 34 Cardiovascular Health Resarch Unit and Department of Medicine, University of Washington, Seattle, WA USA; 35 Cedars-Sinai Medical Center, Medical Genetics Institute, Los Angeles, CA, USA; 36 Erasmus Medical Center, Department of Epidemiology, Rotterdam, The Netherlands; 37 Boston University, School of Public Health, Boston, MA, USA; 38 University of Minnesota School of Public Health, Division of Epidemiology and Community Health, School of Public Health (A.R.F.), Minneapolis, MN, USA; 39 University of Washington, Cardiovascular Health Research Unit and Department of Medicine, Seattle, WA, USA; 40 Icelandic Heart Association, Kopavogur Iceland; 41 University of Iceland, Reykjavik, Iceland; 42 Laboratory of Epidemiology, Demography, and Biometry, Intramural Research Program, National Institute on Aging, National Institutes of Health, Bethesda MD, USA; 43 University of Washington, Department of Epidemiology, Seattle, WA, USA; 44 University of Washington, Department of Biostatistics, Seattle, WA, USA; 45 University of Washington, Department of Internal Medicine, Seattle, WA, USA; 46 University of Texas, School of Public Health, Houston, TX, USA; 47 National Heart, Lung and Blood Institute, Framingham Heart Study, Framingham, MA and Cardiology Division, Massachusetts General Hospital, Boston, MA, USA; 48 Center for Health Studies, Group Health, Departments of Medicine, Epidemiology, and Health Services, Seattle, WA, USA; 49 The Wellcome Trust Sanger Institute, The Wellcome Trust Genome Campus, Hinxton, Cambridge, UK; 50 Cardiovascular Health Research Unit, Departments of Medicine and Epidemiology, University of Washington, Seattle; 51 Boston University Medical Center, Boston, MA, USA; 52 Department of Internal Medicine, Erasmus Medical Center, Rotterdam, The Netherlands; 53 Department of Medicine, Landspitali University Hospital, 101 Reykjavik, Iceland; 54 Boston University School of Medicine, Framingham Heart Study, Framingham, MA, USA; 55 Institut für Klinische Molekularbiologie, Christian-Albrechts Universität, Kiel, Germany; 56 Institute of Epidemiology, Helmholtz Zentrum München – German Research Center for Environmental Health, Neuherberg, Germany; 57 Institut für Humangenetik, Helmholtz Zentrum München, Deutsches Forschungszentrum für Umwelt und Gesundheit, Neuherberg, Germany; 58 Institute of Medical Information Science, Biometry and Epidemiology, Ludwig-Maximilians-Universität München, Germany; 59 Klinikum Grosshadern, Munich, Germany; 60 Institut für Humangenetik, Technische Universität München, Germany; 61 Division of Endocrinology and Diabetes, Graduate School of Molecular Endocrinology and Diabetes, University of Ulm, Ulm, Germany; 62 Division of Endocrinology, Department of Medicine, Medical University of Graz, Austria; 63 Synlab Center of Laboratory Diagnostics Heidelberg, Heidelberg, Germany; 64 Division of Clinical Chemistry, Department of Medicine, Albert Ludwigs University, Freiburg, Germany; 65 LURIC non profit LLC, Freiburg, Germany; 66 Clinical Institute of Medical and Chemical Laboratory Diagnostics, Medical University Graz, Austria; 67 Institute of Public Health, Social and Preventive Medicine, Medical Faculty Manneim, University of Heidelberg, Germany; 68 Cardiology Group Frankfurt-Sachsenhausen, Frankfurt, Germany; 69 Cardiovascular Epidemiology and Genetics Group, Institut Municipal d’Investigació Mèdica, Barcelona; Ciber Epidemiología y Salud Pública (CIBERSP), Spain; 70 Chronic Disease Epidemiology and Prevention Unit, Department of Chronic Disease Prevention, National Institute for Health and Welfare, Helsinki, Finland; 71 Department of Molecular Biology and Center for Human Genetic Research, Massachusetts General Hospital, Harvard Medical School, Boston, USA; 72 The Center for Applied Genomics, Children’s Hospital of Philadelphia, Philadelphia, Pennsylvania, USA; 73 Cardiovascular Research Institute, Medstar Health Research Institute, Washington Hospital Center, Washington, DC 20010, USA; 74 Genetics Division and Drug Discovery, GlaxoSmithKline, King of Prussia, Pennsylvania 19406, USA; 75 The Institute for Translational Medicine and Therapeutics, School of Medicine, University of Pennsylvania, Philadelphia, PA, USA; 76 Department of Cardiovascular Surgery, University of Leicester, Leicester, UK; 77 Division of Cardiovascular and Diabetes Research, Multidisciplinary Cardiovascular Research Centre, Leeds Institute of Genetics, Health and Therapeutics, University of Leeds, Leeds, LS2 9JT, UK; 78 LIGHT Research Institute, Faculty of Medicine and Health, University of Leeds, Leeds, UK
